# Supplementary material
Source: MDPI journal article supplement (https://www.mdpi.com/2079-6412/12/6/869)
Supplement: s1 [file s1]

# Poly(2-methoxyethyl acrylate) (PMEA)-coated anti-platelet adhesive surfaces to mimic native blood vessels through HUVECs attachment, migration, and monolayer formation

Md Azizul Haque <sup>1,2</sup>, Daiki Murakami <sup>1,3,\*</sup>, Takahisa Anada <sup>1,3</sup> and Masaru Tanaka <sup>1,3,\*</sup>

<sup>1</sup> Department of Chemistry and Biochemistry, Graduate School of Engineering, Kyushu University, 744 Motooka, Nishi-ku, Fukuoka 819-0395, Japan; md.azizul.haque.509@s.kyushu-u.ac.jp (A.H.); daiki\_murakami@ms.ifoc.kyushu-u.ac.jp (D.M.); takahisa\_anada@ms.ifoc.kyushu-u.ac.jp (T.A.); masaru\_tanaka@ms.ifoc.kyushu-u.ac.jp (M. T.)

<sup>2</sup> Department of Applied Chemistry and Chemical Engineering, Noakhali Science and Technology University, Noakhali-3814, Bangladesh; mahaque.nstu@edu.bd (A.H.)

<sup>3</sup> Institute for Materials Chemistry and Engineering, Kyushu University, 744 Motooka, Nishi-ku, Fukuoka 819-0395, Japan; daiki\_murakami@ms.ifoc.kyushu-u.ac.jp (D.M.); takahisa\_anada@ms.ifoc.kyushu-u.ac.jp; masaru\_tanaka@ms.ifoc.kyushu-u.ac.jp (M. T.)

\* Correspondence: daiki\_murakami@ms.ifoc.kyushu-u.ac.jp (D.M.); masaru\_tanaka@ms.ifoc.kyushu-u.ac.jp (M. T.); Tel./Fax: +81-92-802-6238 (D.M & M.T.)

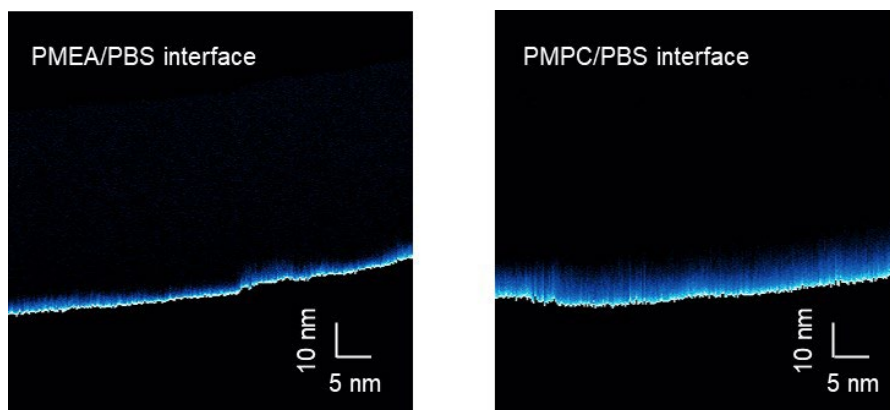

**Figure S1.** Images of FM-AFM z–x scan on (left) PMEA/PBS and (right) PMPC/PBS interface.
